# Supplementary material for: Efficient alignment of primary CNS neurites using structurally engineered surfaces and biochemical cues
Source: Royal Society of Chemistry journal article supplement (doi:10.1039/c4ra15739g), 2015-01-01
Supplement: c4ra15739g1.pdf [file c4ra15739g1.pdf]

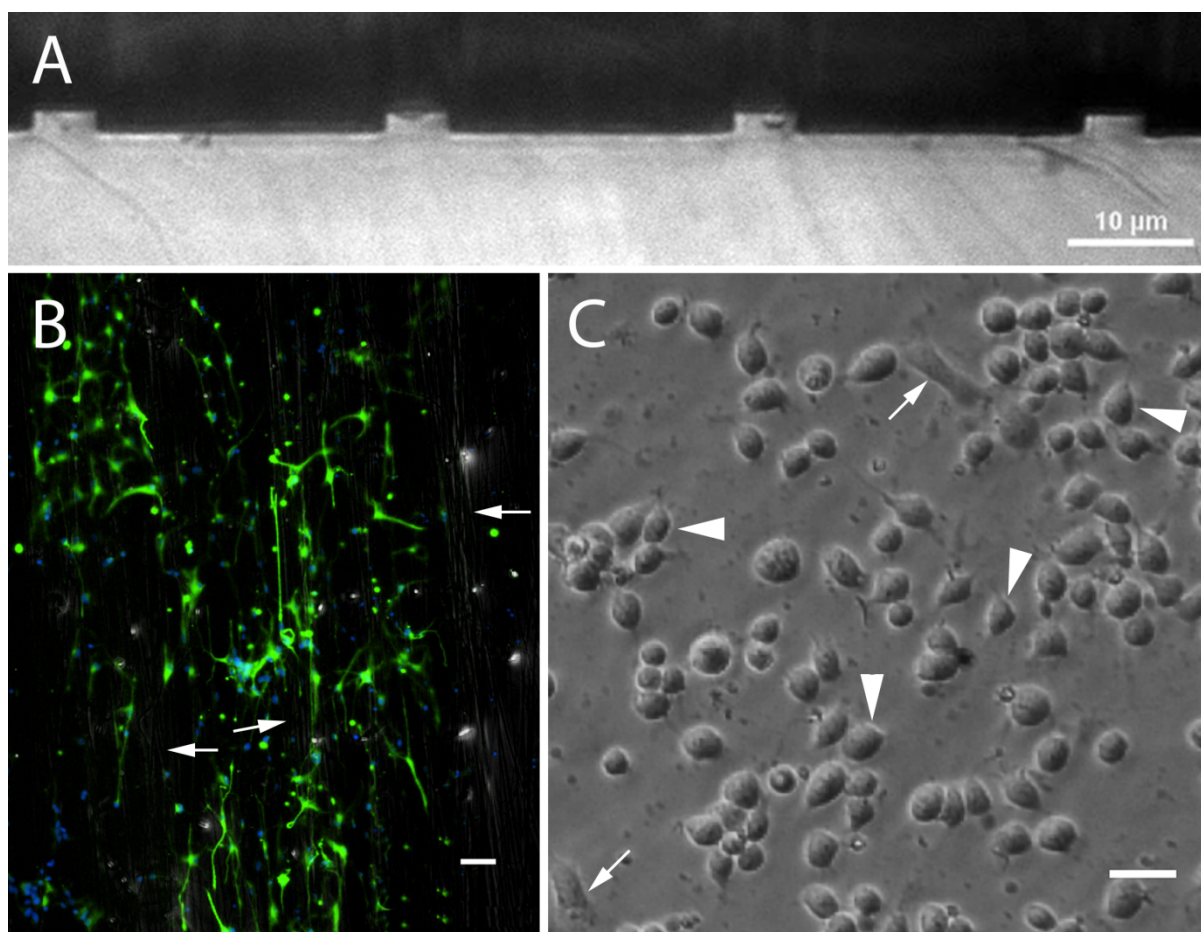

Supplementary figure 1

Supplemental information: A) Cross-sectional view of a PDMS construct (white) showing protruding groove walls (asterisk). Wall dimensions are: width 5 μm, height 2.2 μm. B) GFAP-positive E16 LGE astrocytes (green) aligned on nano-fibers after 7-8 days in culture. Arrows indicate regions where vertically oriented nano-fibers are clearly visible. A DAPI counterstain was used to reveal all cell nuclei (blue). Scale bar = 100 μm. C) E16 LGE cells at 2 hours from plating in neuronal culture medium. Most cells had the morphology of neurons (large phase-bright cell soma, examples indicated with arrowheads). Occasional type I astrocytes were also observed at 2 hours (arrows). Scale bar = 20 μm.
